# Supplementary material for: Induction of lipid oxidation by polyunsaturated fatty acids of marine origin in small intestine of mice fed a high-fat diet
Source: PubMed Central journal article supplement (PMC2662879; doi:10.1186/1471-2164-10-110), 2009-03-16
Supplement: 1471-2164-10-110-S1.pdf [file 1471-2164-10-110-S1.pdf]

**Additional file 1. Differentially regulated probesets expressed in both dietary groups.**

| Process / Affymetrix ID         | Symbol          | Gene name                                                                                                                                                                  | Fold Change | I/D |
|---------------------------------|-----------------|----------------------------------------------------------------------------------------------------------------------------------------------------------------------------|-------------|-----|
| <b>Metabolism - upregulated</b> |                 |                                                                                                                                                                            |             |     |
| 1424853_s_at                    | Cyp4a10         | cytochrome P450, family 4, subfamily a, polypeptide 10                                                                                                                     | 6.96        |     |
| 1416139_at                      | Reg2            | regenerating islet-derived 2                                                                                                                                               | 5.86        |     |
| 1435370_a_at                    | Ces3            | carboxylesterase 3                                                                                                                                                         | 5.54        |     |
| 1435012_x_at                    | Ela3b           | elastase 3B, pancreatic                                                                                                                                                    | 5.17        |     |
| 1449065_at                      | Acot1 = Cte1    | cytosolic acyl-CoA thioesterase 1                                                                                                                                          | 5.13        |     |
| 1437326_x_at                    | Ela3b           | elastase 3B, pancreatic<br>3-hydroxy-3-methylglutaryl-Coenzyme A synthase 2                                                                                                | 4.72        |     |
| 1423858_a_at                    | Hmgcs2          |                                                                                                                                                                            | 4.56        |     |
| 1421868_a_at                    | Pnlip           | pancreatic lipase                                                                                                                                                          | 4.44        |     |
| 1415883_a_at                    | Ela3b           | elastase 3B, pancreatic                                                                                                                                                    | 4.38        |     |
| 1435611_x_at                    | Ela3b           | elastase 3B, pancreatic                                                                                                                                                    | 4.20        |     |
| 1417257_at                      | Cel             | carboxyl ester lipase<br>acyl-CoA thioesterase 1 /// acyl-CoA thioesterase 2                                                                                               | 3.97        |     |
| 1422997_s_at                    | Acot1 /// Acot2 |                                                                                                                                                                            | 3.89        |     |
| 1423436_at                      | Gsta3           | glutathione S-transferase, alpha 3<br>3-hydroxy-3-methylglutaryl-Coenzyme A synthase 2                                                                                     | 3.84        |     |
| 1431833_a_at                    | Hmgcs2          |                                                                                                                                                                            | 3.61        |     |
| 1433431_at                      | Pnlip           | pancreatic lipase                                                                                                                                                          | 3.48        |     |
| 1449081_at                      | Ces3            | carboxylesterase 3                                                                                                                                                         | 3.34        |     |
| 1449486_at                      | Ces1            | carboxylesterase 1                                                                                                                                                         | 3.25        |     |
| 1417273_at                      | Pdk4            | pyruvate dehydrogenase kinase, isoenzyme 4                                                                                                                                 | 3.01        |     |
| 1422716_a_at                    | Acp1            | acid phosphatase 1, soluble                                                                                                                                                | 2.95        |     |
| 1420673_a_at                    | Acox2           | acyl-Coenzyme A oxidase 2, branched chain                                                                                                                                  | 2.91        |     |
| 1434866_x_at                    | Cpt1a           | carnitine palmitoyltransferase 1a, liver                                                                                                                                   | 2.87        |     |
| 1415777_at                      | Pnliprp1        | pancreatic lipase related protein 1                                                                                                                                        | 2.85        |     |
| 1427912_at                      | Cbr3            | carbonyl reductase 3                                                                                                                                                       | 2.75        |     |
| 1421040_a_at                    | Gsta2           | glutathione S-transferase, alpha 2 (Yc2)                                                                                                                                   | 2.73        |     |
| 1419104_at                      | Abhd6           | abhydrolase domain containing 6                                                                                                                                            | 2.64        |     |
| 1415884_at                      | Ela3b           | elastase 3B, pancreatic                                                                                                                                                    | 2.64        |     |
| 1438156_x_at                    | Cpt1a           | carnitine palmitoyltransferase 1a, liver                                                                                                                                   | 2.60        |     |
| 1438310_at                      | Dgkh            | Diacylglycerol kinase, eta                                                                                                                                                 | 2.53        |     |
| 1450884_at                      | Cd36            | CD36 antigen                                                                                                                                                               | 2.50        |     |
| 1419395_at                      | Acot12 = Cach   | cytosolic acetyl-CoA hydrolase                                                                                                                                             | 2.46        |     |
| 1439617_s_at                    | Pck1            | phosphoenolpyruvate carboxykinase 1, cytosolic                                                                                                                             | 2.46        |     |
| 1460674_at                      | Mpra = Paqr7    | membrane progesterin receptor alpha                                                                                                                                        | 2.41        |     |
| 1460606_at                      | Hsd17b13        | hydroxysteroid (17-beta) dehydrogenase 13                                                                                                                                  | 2.39        |     |
| 1421011_at                      | Dhrs8           | dehydrogenase/reductase (SDR family) member 8                                                                                                                              | 2.38        |     |
| 1419365_at                      | Pex11a          | peroxisomal biogenesis factor 11a                                                                                                                                          | 2.36        |     |
| 1455820_x_at                    | Scarb1          | scavenger receptor class B, member 1                                                                                                                                       | 2.25        |     |
| 1422438_at                      | Ephx1           | epoxide hydrolase 1, microsomal                                                                                                                                            | 2.22        |     |
| 1416050_a_at                    | Scarb1          | scavenger receptor class B, member 1                                                                                                                                       | 2.22        |     |
| 1424451_at                      | Acaa1           | 3-ketoacyl-CoA thiolase B                                                                                                                                                  | 2.19        |     |
| 1423166_at                      | Cd36            | CD36 antigen                                                                                                                                                               | 2.19        |     |
| 1423437_at                      | Gsta3           | glutathione S-transferase, alpha 3<br>hydroxyacyl-Coenzyme A dehydrogenase/3-ketoacyl-Coenzyme A thiolase/enoyl-Coenzyme A hydratase (trifunctional protein), beta subunit | 2.19        |     |
| 1437172_x_at                    | Hadhb           |                                                                                                                                                                            | 2.19        |     |
| 1422780_at                      | Pxmp4           | peroxisomal membrane protein 4                                                                                                                                             | 2.19        |     |
| 1450883_a_at                    | Cd36            | CD36 antigen                                                                                                                                                               | 2.17        |     |
| 1423439_at                      | Pck1            | phosphoenolpyruvate carboxykinase 1, cytosolic                                                                                                                             | 2.17        |     |
| 1416632_at                      | Mod1            | malic enzyme, supernatant                                                                                                                                                  | 2.16        |     |
| 1439428_x_at                    | Gmcs            | GDP-mannose 4, 6-dehydratase                                                                                                                                               | 2.14        |     |
| 1450391_a_at                    | Mgll            | monoglyceride lipase                                                                                                                                                       | 2.13        |     |
| 1430307_a_at                    | Mod1            | malic enzyme, supernatant                                                                                                                                                  | 2.13        |     |
| 1449442_at                      | Pex11a          | peroxisomal biogenesis factor 11a                                                                                                                                          | 2.08        |     |
| 1437378_x_at                    | Scarb1          | scavenger receptor class B, member 1                                                                                                                                       | 2.08        |     |
| 1416429_a_at                    | Cat             | catalase                                                                                                                                                                   | 2.07        |     |
| 1419510_at                      | Es22            | esterase 22                                                                                                                                                                | 2.06        |     |
| 1441860_x_at                    | Ide             | Insulin degrading enzyme                                                                                                                                                   | 2.01        |     |

|                                                                     |                                         |                                                                                                                                                                           |      |    |
|---------------------------------------------------------------------|-----------------------------------------|---------------------------------------------------------------------------------------------------------------------------------------------------------------------------|------|----|
| 1419622_at                                                          | Ugt2b5                                  | UDP-glucuronosyltransferase 2 family, member 5<br>phosphoribosylaminoimidazole carboxylase,<br>phosphoribosylaminoribosylaminoimidazole,<br>succinocarboxamide synthetase | 2.01 | I  |
| 1436298_x_at                                                        | Paics                                   |                                                                                                                                                                           | 2.00 | I  |
| 1450037_at                                                          | Usp9x                                   | ubiquitin specific protease 9, X chromosome                                                                                                                               | 2.03 | MI |
| <b><u>Metabolism - downregulated</u></b>                            |                                         |                                                                                                                                                                           |      |    |
| 1436712_at                                                          | Pla2g4c                                 | phospholipase A2, group IVC (cytosolic, calcium-independent)                                                                                                              | 9.78 | D  |
| 1444662_at                                                          | Pla2g4c                                 | phospholipase A2, group IVC (cytosolic, calcium-independent)                                                                                                              | 5.66 | D  |
| 1449907_at                                                          | Bcmo1                                   | beta-carotene 15,15'-monooxygenase                                                                                                                                        | 2.20 | D  |
| 1423418_at                                                          | Fdps                                    | farnesyl diphosphate synthetase                                                                                                                                           | 2.20 | D  |
| 1415993_at                                                          | Sqle                                    | squalene epoxidase                                                                                                                                                        | 2.14 | D  |
| 1450788_at                                                          | Saa1                                    | serum amyloid A 1                                                                                                                                                         | 2.10 | D  |
| 1428140_at                                                          | Oxct1                                   | 3-oxoacid CoA transferase 1                                                                                                                                               | 2.04 | D  |
| 1450646_at                                                          | Cyp51                                   | Cytochrome P450, family 51                                                                                                                                                | 2.03 | D  |
| 1421821_at                                                          | Ldlr                                    | Low density lipoprotein receptor                                                                                                                                          | 2.01 | D  |
| 1419075_s_at                                                        | Saa1 / Saa2                             | serum amyloid A 1 / serum amyloid A 2                                                                                                                                     | 2.01 | D  |
| 1449326_x_at                                                        | Saa2                                    | serum amyloid A 2                                                                                                                                                         | 2.13 | MD |
| <b><u>Transport - upregulated</u></b>                               |                                         |                                                                                                                                                                           |      |    |
| 1422008_a_at                                                        | Aqp3                                    | aquaporin 3                                                                                                                                                               | 4.59 | I  |
| 1450460_at                                                          | Aqp3                                    | aquaporin 3                                                                                                                                                               | 3.10 | I  |
| 1422007_at                                                          | Aqp3                                    | aquaporin 3                                                                                                                                                               | 3.03 | I  |
| 1429727_at                                                          | Slc16a9                                 | solute carrier family 16 (monocarboxylic acid transporters), member 9                                                                                                     | 2.60 | I  |
| 1419758_at                                                          | Abcb1a                                  | ATP-binding cassette, sub-family B (MDR/TAP), member 1A                                                                                                                   | 2.48 | I  |
| 1421848_at                                                          | Slc22a5                                 | solute carrier family 22 (organic cation transporter), member 5                                                                                                           | 2.19 | I  |
| 1419759_at                                                          | Abcb1a                                  | ATP-binding cassette, sub-family B (MDR/TAP), member 1A                                                                                                                   | 2.07 | I  |
| <b><u>Transport - downregulated</u></b>                             |                                         |                                                                                                                                                                           |      |    |
| 1416854_at                                                          | Slc34a2                                 | solute carrier family 34 (sodium phosphate), member 2                                                                                                                     | 4.86 | D  |
| 1418538_at                                                          | Kdelr3                                  | KDEL (Lys-Asp-Glu-Leu) endoplasmic reticulum protein retention receptor 3                                                                                                 | 2.81 | D  |
| 1417415_at                                                          | Slc6a3                                  | solute carrier family 6 (neurotransmitter transporter, dopamine), member 3                                                                                                | 2.13 | D  |
| <b><u>Apoptosis/ cell cycle - upregulated</u></b>                   |                                         |                                                                                                                                                                           |      |    |
| 1448700_at                                                          | G0s2                                    | G0/G1 switch gene 2                                                                                                                                                       | 3.03 | I  |
| 1451392_at                                                          | Rbed1                                   | RNA binding motif and ELMO domain 1                                                                                                                                       | 2.28 | I  |
| 1422470_at                                                          | Bnip3                                   | BCL2/adenovirus E1B 19kDa-interacting protein 1, NIP3                                                                                                                     | 2.16 | I  |
| 1455938_x_at                                                        | Rad21                                   | RAD21 homolog (S. pombe)                                                                                                                                                  | 2.08 | I  |
| <b><u>Apoptosis/ cell cycle - downregulated</u></b>                 |                                         |                                                                                                                                                                           |      |    |
| 1452318_a_at                                                        | Hspa1b                                  | heat shock protein 1B                                                                                                                                                     | 2.46 | D  |
| 1427127_x_at                                                        | Hspa1b / Hspa1a                         | heat shock protein 1B /// heat shock protein 1A                                                                                                                           | 2.39 | D  |
| 1417040_a_at                                                        | Bok                                     | Bcl-2-related ovarian killer protein                                                                                                                                      | 2.11 | D  |
| 1427126_at                                                          | Hspa1b                                  | heat shock protein 1B                                                                                                                                                     | 2.08 | D  |
| <b><u>Cell adhesion/ homeostasis/ structure - upregulated</u></b>   |                                         |                                                                                                                                                                           |      |    |
| 1456244_x_at                                                        | Txn12                                   | thioredoxin-like 2                                                                                                                                                        | 2.55 | I  |
| 1455232_at                                                          | Cml2                                    | camello-like 2                                                                                                                                                            | 2.20 | I  |
| 1449269_at                                                          | F5                                      | coagulation factor V                                                                                                                                                      | 2.14 | I  |
| 1452679_at                                                          | Tubb2b                                  | RIKEN cDNA 2410129E14 gene                                                                                                                                                | 2.08 | I  |
| <b><u>Cell adhesion/ homeostasis/ structure - downregulated</u></b> |                                         |                                                                                                                                                                           |      |    |
| 1437258_at                                                          | Sprr2a                                  | small proline-rich protein 2A                                                                                                                                             | 3.01 | D  |
| <b><u>Digestion - upregulated</u></b>                               |                                         |                                                                                                                                                                           |      |    |
| 1415954_at                                                          | Try4 /// Prss1 ///<br>1810049H19Rik /// | trypsinogen 16 /// RIKEN cDNA 1810049H19 gene<br>/// trypsin 4                                                                                                            | 5.58 | I  |
| 1428102_at                                                          | Cpb1                                    | Carboxypeptidase B1 (tissue)                                                                                                                                              | 5.03 | I  |
| 1435507_x_at                                                        | Prss2                                   | protease, serine, 2                                                                                                                                                       | 4.29 | I  |
| 1448220_at                                                          | Ctrb1                                   | chymotrypsinogen B1                                                                                                                                                       | 4.26 | I  |
| 1433573_x_at                                                        | Prss2                                   | protease, serine, 2                                                                                                                                                       | 3.89 | I  |
| 1417682_a_at                                                        | Prss2                                   | protease, serine, 2                                                                                                                                                       | 3.81 | I  |
| 1433459_x_at                                                        | Prss2                                   | protease, serine, 2                                                                                                                                                       | 3.73 | I  |

|                                                        |                                                     |                                                                                                                                                                |      |    |
|--------------------------------------------------------|-----------------------------------------------------|----------------------------------------------------------------------------------------------------------------------------------------------------------------|------|----|
| 1431763_a_at                                           | Ctrl                                                | chymotrypsin-like                                                                                                                                              | 2.99 | I  |
| <b><u>Immune system - upregulated</u></b>              |                                                     |                                                                                                                                                                |      |    |
| 1418734_at                                             | H1-K1 / H2-Q1 / H2-Q2<br>Hmgb1 ///                  | histocompatibility 2, K1, K region ///<br>histocompatibility 2, Q region locus 1 ///<br>histocompatibility 2, Q region locus 2                                 | 2.13 | I  |
| 1448235_s_at                                           | 4932431P20Rik                                       | RIKEN cDNA 4932431P20 gene ///<br>high mobility<br>group box 1                                                                                                 | 2.08 | MI |
| <b><u>Immune system - downregulated</u></b>            |                                                     |                                                                                                                                                                |      |    |
| 1425137_a_at                                           | H2-Q10                                              | histocompatibility 2, Q region locus 10                                                                                                                        | 8.22 | D  |
| 1418787_at                                             | Mbl2                                                | mannose binding lectin, serum (C)                                                                                                                              | 3.18 | D  |
| 1418652_at                                             | Cxcl9                                               | chemokine (C-X-C motif) ligand 9                                                                                                                               | 2.00 | D  |
| <b><u>Hemopoiesis - upregulated</u></b>                |                                                     |                                                                                                                                                                |      |    |
| 1422492_at                                             | Cpox                                                | coproporphyrinogen oxidase                                                                                                                                     | 2.30 | I  |
| <b><u>Hemopoiesis - downregulated</u></b>              |                                                     |                                                                                                                                                                |      |    |
| 1420871_at                                             | Gucy1b3                                             | guanylate cyclase 1, soluble, beta 3                                                                                                                           | 2.27 | D  |
| 1417311_at                                             | Crip2                                               | cysteine rich protein 2                                                                                                                                        | 2.07 | MD |
| <b><u>Transcription/ translation - upregulated</u></b> |                                                     |                                                                                                                                                                |      |    |
| 1438487_s_at                                           | Zzz3                                                | zinc finger, ZZ domain containing 3                                                                                                                            | 2.38 | I  |
| 1438211_s_at                                           | Dbp                                                 | D site albumin promoter binding protein                                                                                                                        | 2.28 | I  |
| 1423142_a_at                                           | Gtpbp4                                              | GTP binding protein 4                                                                                                                                          | 2.06 | I  |
| <b><u>Signal transduction - upregulated</u></b>        |                                                     |                                                                                                                                                                |      |    |
| 1428942_at                                             | Mt2                                                 | metallothionein 2                                                                                                                                              | 2.77 | I  |
| 1429206_at                                             | Rhobtb1                                             | Rho-related BTB domain containing 1                                                                                                                            | 2.35 | I  |
| <b><u>Steroid hormone metabolism - upregulated</u></b> |                                                     |                                                                                                                                                                |      |    |
| 1426856_at                                             | Hsd12                                               | hydroxysteroid dehydrogenase like 2                                                                                                                            | 2.60 | I  |
| 1460232_s_at                                           | Hsd3b2 ///<br>Hsd3b3 ///<br>Hsd3b6                  | hydroxysteroid dehydrogenase-2, delta<5>-3-beta<br>///<br>hydroxysteroid dehydrogenase-6, delta<5>-3-beta<br>beta                                              | 2.50 | I  |
| 1427377_x_at                                           | Hsd3b3                                              | Hydroxysteroid dehydrogenase-3, delta<5>-3-beta                                                                                                                | 2.00 | I  |
| <b><u>Miscellaneous/ unknown - upregulated</u></b>     |                                                     |                                                                                                                                                                |      |    |
| 1422434_a_at                                           | 2210010C04Rik                                       | RIKEN cDNA 2210010C04 gene                                                                                                                                     | 4.79 | I  |
| 1448894_at                                             | Akr1b8                                              | aldo-keto reductase family 1, member B8                                                                                                                        | 4.26 | I  |
| 1428005_at                                             | Mosc1                                               | MOCO sulphurase C-terminal domain containing 1                                                                                                                 | 3.86 | I  |
| 1422435_at                                             | 2210010C04Rik                                       | RIKEN cDNA 2210010C04 gene                                                                                                                                     | 3.53 | I  |
| 1417769_at                                             | ---                                                 | ---                                                                                                                                                            | 2.95 | I  |
| 1442445_at                                             | 2610027H17Rik                                       | RIKEN cDNA 2610027H17 gene                                                                                                                                     | 2.81 | I  |
| 1457619_at                                             | BC015286                                            | cDNA sequence BC015286<br>Adult male medulla oblongata cDNA, RIKEN full-length enriched library, clone:6330531L09<br>product:unknown EST, full insert sequence | 2.68 | I  |
| 1440325_at                                             | ---                                                 | Similar to 3(20)alpha-hydroxysteroid/dihydrodiol/indanol dehydrogenase                                                                                         | 2.66 | I  |
| 1455454_at                                             | Akr1c19                                             | hydroxysteroid/dihydrodiol/indanol dehydrogenase                                                                                                               | 2.55 | I  |
| 1425470_at                                             | ---                                                 | ---                                                                                                                                                            | 2.51 | I  |
| 1424211_at                                             | 5730438N18Rik                                       | RIKEN cDNA 5730438N18 gene                                                                                                                                     | 2.48 | I  |
| 1443673_x_at                                           | ---                                                 | ---                                                                                                                                                            | 2.46 | I  |
| 1424716_at                                             | 0610039N19Rik                                       | RIKEN cDNA 0610039N19 gene                                                                                                                                     | 2.45 | I  |
| 1438786_a_at                                           | 2610021A01Rik ///<br>LOC668572<br>9630055N22Rik /// | RIKEN cDNA 2610021A01 gene ///<br>similar to zinc<br>finger protein 347                                                                                        | 2.39 | I  |
| 1434424_at                                             | LOC670389<br>LOC278757 ///<br>LOC631624             | RIKEN cDNA 9630055N22 gene<br>similar to reduced expression 2 ///<br>similar to<br>reduced expression 2                                                        | 2.30 | I  |
| 1436330_x_at                                           | LOC631624                                           | reduced expression 2                                                                                                                                           | 2.28 | I  |
| 1452565_x_at                                           | LOC641050                                           | hypothetical protein LOC641050                                                                                                                                 | 2.28 | I  |
| 1429527_a_at                                           | Plscr1                                              | phospholipid scramblase 1                                                                                                                                      | 2.20 | I  |
| 1438259_at                                             | ---                                                 | ---                                                                                                                                                            | 2.16 | I  |
| 1429822_at                                             | 4633401B06Rik                                       | RIKEN cDNA 4633401B06 gene                                                                                                                                     | 2.16 | I  |
| 1448964_at                                             | S100g                                               | S100 calcium binding protein G                                                                                                                                 | 2.16 | I  |
| 1424913_at                                             | 2310044G17Rik                                       | RIKEN cDNA 2310044G17 gene                                                                                                                                     | 2.13 | I  |
| 1449345_at                                             | 2810027O19Rik                                       | RIKEN cDNA 2810027O19 gene                                                                                                                                     | 2.13 | I  |
| 1431916_at                                             | 9030618K22Rik                                       | RIKEN cDNA 9030618K22 gene                                                                                                                                     | 2.11 | I  |
| AFFX-TransRecMur/<br>X57349_M_at                       | Tfrc                                                | transferrin receptor                                                                                                                                           | 2.11 | I  |
| 1437873_at                                             | 6030490I01Rik                                       | RIKEN cDNA 6030490I01 gene                                                                                                                                     | 2.07 | I  |
| 1448281_a_at                                           | Ela2                                                | elastase 2                                                                                                                                                     | 2.04 | I  |
| 1443773_at                                             | Ylpm1                                               | YLP motif containing 1                                                                                                                                         | 2.46 | MI |
| <b><u>Miscellaneous/ unknown - downregulated</u></b>   |                                                     |                                                                                                                                                                |      |    |

|              |                   |                                                                             |      |    |
|--------------|-------------------|-----------------------------------------------------------------------------|------|----|
| 1419591_at   | Mlze              | melanoma-derived leucine zipper, extra-nuclear factor                       | 4.56 | D  |
| 1430641_at   | 9030605I04Rik /// | RIKEN cDNA 9030605I04 gene ///                                              |      |    |
| 1454883_at   | AI987692          | RIKEN cDNA 9030605I04 gene /// expressed sequence AI987692                  | 3.97 | D  |
| 1425099_a_at | AI987692          | expressed sequence AI987692                                                 | 3.58 | D  |
| 1440157_at   | Arntl             | aryl hydrocarbon receptor nuclear translocator-like                         | 2.50 | D  |
| 1422137_at   | Scml4             | Sex comb on midleg-like 4 (Drosophila)                                      | 2.50 | D  |
| 1455531_at   | 9030623N16Rik     | RIKEN cDNA 9030623N16 gene                                                  | 2.48 | D  |
| 1443923_at   | A930031D07Rik     | RIKEN cDNA A930031D07 gene                                                  | 2.39 | D  |
| 1426542_at   | Akap13            | RIKEN cDNA 9630026M06 gene                                                  | 2.35 | D  |
|              | Endod1            | RIKEN cDNA 2310067E08 gene                                                  | 2.04 | D  |
|              |                   | Adult male cecum cDNA, RIKEN full-length enriched library, clone:9130204C03 |      |    |
| 1435265_at   | ---               | product:unclassifiable, full insert sequence                                | 2.00 | D  |
| 1419098_at   | Stom              | stomatin                                                                    | 2.00 | D  |
| 1457296_at   | Cilp              | cartilage intermediate layer protein, nucleotide pyrophosphohydrolase       | 2.14 | MD |

Probesets were selected on the basis of expression in both dietary groups and showing differentially regulation by EPA&DHA ( $FC \geq 2$ ,  $p\text{-value} \leq 0.0027$ ). Grouping per biological process is based on the total number of unique annotated genes (see Table 1), and sorted accordingly. Within each process, probesets are sorted by decreasing FC (increased followed by decreased).

I: increased, D: decreased, M(I or D): medium (increased or decreased) according to Affymetrix

MAS5.0 data analysis.
