# Supplementary material for: Induction of lipid oxidation by polyunsaturated fatty acids of marine origin in small intestine of mice fed a high-fat diet
Source: PubMed Central journal article supplement (PMC2662879; doi:10.1186/1471-2164-10-110), 2009-03-16
Supplement: 1471-2164-10-110-S3.pdf [file 1471-2164-10-110-S3.pdf]

**Additional file 3. Transcription factors enriched for involvement with differentially expressed genes.**

| <b>Transcription Factor Symbol</b> | <b>Name</b>                                        | <b>Number of linked input genes (%)</b> |
|------------------------------------|----------------------------------------------------|-----------------------------------------|
| PPARalpha                          | peroxisome proliferator activated receptor alpha   | 27 (54%)                                |
| NF-κB                              | nuclear factor kappa beta                          | 20 (40%)                                |
| Stat3                              | signal transducer and activator of transcription 3 | 14 (28%)                                |
| Sp1                                | trans-acting transcription factor 1                | 10 (20%)                                |
| Ahr                                | aryl-hydrocarbon receptor                          | 7 (14%)                                 |
| Arnt1                              | aryl hydrocarbon receptor nuclear translocator     | 4 (8%)                                  |
| Dbp                                | D site albumin promoter binding protein            | 2 (4%)                                  |
