# Supplementary material for: Induction of lipid oxidation by polyunsaturated fatty acids of marine origin in small intestine of mice fed a high-fat diet
Source: PubMed Central journal article supplement (PMC2662879; doi:10.1186/1471-2164-10-110), 2009-03-16
Supplement: 1471-2164-10-110-S4.pdf [file 1471-2164-10-110-S4.pdf]

**Additional file 4. Differentially regulated probesets expressed in only one dietary group.**

| Probeset ID                                                            | Gene Symbol          | Gene Title                                                                                               | FC    | I/D |
|------------------------------------------------------------------------|----------------------|----------------------------------------------------------------------------------------------------------|-------|-----|
| <b><u>metabolism</u></b>                                               |                      |                                                                                                          |       |     |
| 1424943_at                                                             | Cyp4a10              | cytochrome P450, family 4, subfamily a, polypeptide 10                                                   | 21.26 | I   |
| 1427052_at                                                             | Acacb                | acetyl-Coenzyme A carboxylase beta                                                                       | 6.87  | I   |
| 1422925_s_at                                                           | Acot3                | acyl-CoA thioesterase 3                                                                                  | 5.74  | I   |
| 1445980_at                                                             | Aldh1a1              | Aldehyde dehydrogenase family 1, subfamily A1                                                            | 2.01  | I   |
| 1441413_at                                                             | Cat                  | Catalase                                                                                                 | 2.39  | I   |
| 1435371_x_at                                                           | Ces3                 | carboxylesterase 3                                                                                       | 3.10  | I   |
| 1428062_at                                                             | Cpa1                 | carboxypeptidase A1                                                                                      | 3.34  | I   |
| 1454623_at                                                             | Cpa2                 | carboxypeptidase A2, pancreatic                                                                          | 16.22 | I   |
| 1440134_at                                                             | Cyp4a10<br>Gstm1 /// | cytochrome P450, family 4, subfamily a, polypeptide 10                                                   | 4.32  | I   |
| 1425627_x_at                                                           | LOC433943            | glutathione S-transferase, mu 1                                                                          | 2.27  | I   |
| 1425127_at                                                             | Hsd3b2               | hydroxysteroid dehydrogenase-2, delta<5>-3-beta                                                          | 2.30  | I   |
| 1453836_a_at                                                           | Mgll                 | monoglyceride lipase                                                                                     | 2.55  | I   |
| 1419000_at                                                             | Cpxm2                | carboxypeptidase X 2 (M14 family)                                                                        | 8.00  | D   |
| 1434862_at                                                             | Fut2                 | fucosyltransferase 2                                                                                     | 3.10  | D   |
| 1434499_a_at                                                           | Ldhb                 | lactate dehydrogenase B                                                                                  | 14.93 | D   |
| 1452940_x_at                                                           | Pitpnc1              | phosphatidylinositol transfer protein, cytoplasmic 1                                                     | 2.00  | MD  |
| <b><u>transcription/translation/splicing</u></b>                       |                      |                                                                                                          |       |     |
| 1437262_x_at                                                           | Bcas2                | breast carcinoma amplified sequence 2                                                                    | 5.58  | I   |
| 1459828_at                                                             | Srrm1                | Serine/arginine repetitive matrix 1                                                                      | 2.03  | I   |
| 1441876_x_at                                                           | Zfp93                | Zinc finger protein 93                                                                                   | 9.19  | MI  |
| 1459804_at                                                             | Crebbp               | CREB binding protein                                                                                     | 15.24 | D   |
| 1420573_at                                                             | Hoxd1                | homeo box D1                                                                                             | 6.96  | D   |
| 1431134_at                                                             | Ing5                 | inhibitor of growth family, member 5                                                                     | 2.19  | D   |
| 1426498_at                                                             | Jarid1c              | jumonji, AT rich interactive domain 1C (Rbp2 like)                                                       | 5.39  | D   |
| 1427400_at                                                             | Lbx1                 | ladybird homeobox homolog 1 (Drosophila)                                                                 | 3.10  | D   |
| 1446389_at                                                             | Nrip1                | Nuclear receptor interacting protein 1                                                                   | 2.06  | D   |
| <b><u>cell adhesion/ proliferation/ differentiation/ structure</u></b> |                      |                                                                                                          |       |     |
| 1447077_at                                                             | Add3                 | Adducin 3 (gamma)                                                                                        | 19.16 | D   |
| 1416077_at                                                             | Adm                  | adrenomedullin                                                                                           | 2.50  | D   |
| 1426283_at                                                             | Hnt                  | neurotrimin                                                                                              | 2.81  | D   |
| 1448201_at                                                             | Sfrp2                | secreted frizzled-related protein 2                                                                      | 6.41  | D   |
| 1417136_s_at                                                           | Srpk2                | serine/arginine-rich protein specific kinase 2                                                           | 2.31  | D   |
| 1422047_at                                                             | Cdh5                 | cadherin 5                                                                                               | 5.03  | MD  |
| 1438410_at                                                             | Prtg                 | protogenin homolog (Gallus gallus)                                                                       | 4.53  | MD  |
| <b><u>signal transduction</u></b>                                      |                      |                                                                                                          |       |     |
| 1417331_a_at                                                           | Arl6                 | ADP-ribosylation factor-like 6                                                                           | 4.38  | D   |
| 1424376_at                                                             | Cdc42ep1             | CDC42 effector protein (Rho GTPase binding) 1                                                            | 2.53  | D   |
| 1425856_at                                                             | Cib1                 | Calcium and integrin binding 1 (calmyrin)<br>eukaryotic translation initiation factor 4E binding protein | 2.87  | D   |
| 1456613_at                                                             | Eif4ebp2             | 2                                                                                                        | 2.41  | D   |
| 1416266_at                                                             | Pdyn                 | prodynorphin                                                                                             | 3.34  | D   |
| 1446918_at                                                             | Lphn3                | Latrophilin 3                                                                                            | 5.74  | MD  |
| 1424963_at                                                             | Rp1h                 | retinitis pigmentosa 1 homolog (human)                                                                   | 4.35  | MD  |
| <b><u>transport</u></b>                                                |                      |                                                                                                          |       |     |
| 1436770_x_at                                                           | Psma1                | proteasome (prosome, macropain) subunit, alpha type 1                                                    | 25.81 | I   |
| 1439843_at                                                             | Camk4                | calcium/calmodulin-dependent protein kinase IV                                                           | 2.75  | D   |
| 1445434_at                                                             | Snupn                | Snurportin 1                                                                                             | 4.63  | D   |

|                                            |           |                                                                                |       |    |
|--------------------------------------------|-----------|--------------------------------------------------------------------------------|-------|----|
| 1447856_x_at                               | Slc25a25  | solute carrier family 25 (mitochondrial carrier, phosphate carrier), member 25 | 2.73  | D  |
| 1443676_at                                 | Slc4a4    | Solute carrier family 4 (anion exchanger), member 4                            | 3.58  | D  |
| 1418030_at                                 | Slco3a1   | solute carrier organic anion transporter family, member 3a1                    | 6.45  | D  |
| <b><u>protein folding/modification</u></b> |           |                                                                                |       |    |
| 1428474_at                                 | Ppp3cb    | protein phosphatase 3, catalytic subunit, beta isoform                         | 2.10  | I  |
| 1423553_at                                 | Dnajb3    | DnaJ (Hsp40) homolog, subfamily B, member 3                                    | 2.48  | D  |
| 1428640_at                                 | Hsf2bp    | heat shock transcription factor 2 binding protein                              | 2.13  | D  |
| 1438253_at                                 | Ssh1      | slingshot homolog 1 (Drosophila)                                               | 8.28  | D  |
| 1416504_at                                 | Ulk1      | Unc-51 like kinase 1 (C. elegans)                                              | 3.07  | D  |
| <b><u>cell cycle</u></b>                   |           |                                                                                |       |    |
| 1456744_x_at                               | Fln       | folliculin                                                                     | 8.63  | I  |
| 1431605_at                                 | Rb1cc1    | RB1-inducible coiled-coil 1                                                    | 2.00  | MD |
| <b><u>growth factor</u></b>                |           |                                                                                |       |    |
| 1457123_at                                 | Nrg4      | neuregulin 4                                                                   | 3.12  | I  |
| 1418376_at                                 | Fgf15     | fibroblast growth factor 15                                                    | 7.11  | D  |
| <b><u>miscellaneous/unknown</u></b>        |           |                                                                                |       |    |
| 1435132_at                                 | Disp1     | dispatched homolog 1 (Drosophila)                                              | 5.82  | I  |
| 1448600_s_at                               | Vav3      | vav 3 oncogene                                                                 | 4.86  | I  |
| 1443043_at                                 | Otop2     | otopetrin 2                                                                    | 2.07  | I  |
| 1416929_at                                 | Rbm12     | RNA binding motif protein 12                                                   | 2.43  | I  |
| 1417122_at                                 | Vav3      | vav 3 oncogene                                                                 | 3.20  | I  |
| 1443179_at                                 | Csmd1     | CUB and Sushi multiple domains 1                                               | 13.27 | MI |
| 1439144_at                                 | Cwf19l1   | CWF19-like 1, cell cycle control (S. pombe)                                    | 2.57  | D  |
| 1458012_at                                 | Dach2     | dachshund 2 (Drosophila)                                                       | 48.17 | D  |
| 1451853_at                                 | Fcmd      | Fukuyama type congenital muscular dystrophy homolog (human)                    | 2.39  | D  |
| 1419196_at                                 | Hamp1     | hepcidin antimicrobial peptide 1                                               | 3.97  | D  |
| 1436743_at                                 | Igsf4d    | immunoglobulin superfamily, member 4                                           | 42.81 | D  |
| 1438445_at                                 | Lrrc8e    | leucine rich repeat containing 8 family, member E                              | 12.38 | D  |
| 1449989_at                                 | Mcpt2     | mast cell protease 2                                                           | 2.73  | D  |
| 1457113_at                                 | Nasp ///  |                                                                                |       |    |
| 1457113_at                                 | D4Ert767e | nuclear autoantigenic sperm protein (histone-binding)                          | 4.66  | D  |
| 1431896_at                                 | Six6os1   | Six6 opposite strand transcript 1                                              | 24.25 | D  |
| 1434429_at                                 | Syt16     | synaptotagmin XVI                                                              | 2.25  | D  |
| 1442074_at                                 | Clec2g    | C-type lectin domain family 2, member g                                        | 2.46  | MD |
| 1446777_at                                 | Spp2      | Secreted phosphoprotein 2                                                      | 7.41  | MD |

Probesets were selected on the basis of expression in only one dietary group and showing differential

regulation by EPA&DHA (absolute fold change (FC)  $\geq 2$ , p-value  $\leq 0.0027$ ). Grouping per biological

process is based on the total number of unique annotated genes (see Table 2), and sorted

accordingly. Within each process, probesets are sorted by decreasing FC (increased followed by

decreased). I: increased, D: decreased, M (I or D): medium (increased or decreased) according to

Affymetrix MAS5.0 data analysis.
