# Supplementary material for: Induction of lipid oxidation by polyunsaturated fatty acids of marine origin in small intestine of mice fed a high-fat diet
Source: PubMed Central journal article supplement (PMC2662879; doi:10.1186/1471-2164-10-110), 2009-03-16
Supplement: 1471-2164-10-110-S5.pdf [file 1471-2164-10-110-S5.pdf]

## Additional file 5. Real-time quantitative RT-PCR: genes and primers

| gene symbol   | gene name                                                       | Accession number (RefSeq) | Forward primer (5' – 3')     | Reverse primer (5' – 3')      |
|---------------|-----------------------------------------------------------------|---------------------------|------------------------------|-------------------------------|
| <i>Acaa1a</i> | acetyl-Coenzyme A acyltransferase 1A, 3-ketoacyl-CoA thiolase A | NM_130864                 | CGGGAGCAAGGCAGTTGTC          | GCTGAGTGCCACGCAGAC            |
| <i>Acaa1b</i> | acetyl-Coenzyme A acyltransferase 1B, 3-ketoacyl-CoA thiolase B | NM_146230                 | CGGGAGCAAGGCAGTTGTC          | GCTGAGTGCCACGCAGAC            |
| <i>Acacb</i>  | acetyl-Coenzyme A carboxylase beta                              | NM_133904                 | ACTGTGGAGTATCTCGTTAACCTTCTG  | GGACTGTCGGGCTACCTTGAG         |
| <i>Acox1</i>  | acyl-Coenzyme A oxidase 1, palmitoyl                            | NM_015729                 | GCAGATAAACTCCCAAGATCAAGAC    | TAAAGTCAAAGGCATCCACCAAAAGC    |
| <i>Acox2</i>  | acyl-Coenzyme A oxidase 2, branched chain                       | NM_053115                 | CGGAAGGACGCCATCTTGTAAC       | TGGTCTGAATCCTTTGGCTTTTC       |
| <i>Acox3</i>  | acyl-Coenzyme A oxidase 3, pristanoyl                           | NM_030721                 | TCTACCGAGGTGGCTACATTCTG      | GCACGCTCTAGCACACCATTG         |
| <i>Cpt1a</i>  | carnitine palmitoyltransferase 1a, liver                        | NM_013495                 | GCTGATGACGGCTATGGTGTTC       | TTGTACTACTAGAGTCCATTTTCTTCC   |
| <i>Cpt2</i>   | carnitine palmitoyltransferase 2                                | NM_009949                 | GCTCCGAGGCATTTGTCAGG         | TTGTGTTTTATCCGCTGGTATGC       |
| <i>Ela2</i>   | elastase 2                                                      | NM_007919                 | GGTGGGGAAGCTCTGTGAAGTC       | GACCCTGGTGAAGACGGATGG         |
| <i>Ela3b</i>  | elastase 3B, pancreatic                                         | NM_026419                 | GCAACGGTGACTCTGGAGGAC        | GCCAGCGAACCTTGGATCTAG         |
| <i>H2Q10</i>  | histocompatibility 2, Q region locus 10                         | NM_010391                 | GAGAAGGAGAAACACAGGTAGAAAAGG  | CCACAGGAACACAGAGAACATCAG      |
| <i>Hmgcs1</i> | 3-hydroxy-3-methylglutaryl-Coenzyme A synthase 1                | NM_145942                 | GCCCTTCACAAATGACCACAG        | CATTCTCCAACCGTTTCCATACC       |
| <i>Hmgcs2</i> | 3-hydroxy-3-methylglutaryl-Coenzyme A synthase 2                | NM_008256                 | CTACCTGCGGGCCTTGGATC         | GCCCTTGATAAGTTGTTCTGTTTGTC    |
| <i>Hsd3b</i>  | 3-beta-hydroxysteroid dehydrogenase (family member 2, 3 and 6)  | NM_001012306              | CAGGTGCTGTTGCCCTCTTTTGA      | AGGCTATACATGCTYTGAATGSGGAG    |
| <i>Mod1</i>   | malic enzyme, supernatant                                       | NM_008615                 | GAGGTCATATCTCAGCAAGTGTCAG    | AATCAGGTAGGATCTGGTCATAATTAGTG |
| <i>Pck1</i>   | phosphoenolpyruvate carboxykinase 1, cytosolic                  | NM_011044                 | GTTTGTAGGAGCAGCCATGAGATC     | CCAGAGGAACTTGCCATCTTTGTC      |
| <i>Pdk4</i>   | pyruvate dehydrogenase kinase, isoenzyme 4                      | NM_013743                 | CTTACAATCAAGATTTCTGACCGAGGAG | ATAATGTTTGAAGGCTGACTTGTAAAGAC |
| <i>Sqle</i>   | squalene epoxidase                                              | NM_009270                 | GCTTCTGTATTTTAAACTTGGTGAGAG  | AGTGGAAATAGGATAGAACACGCTTTG   |
| <i>Canx</i>   | calnexin (reference gene)                                       | NM_007597                 | GCAGCGACCTATGATTGACAACC      | GCTCCAAACCAATAGCACTGAAAGG     |
| <i>Hprt1</i>  | hypoxanthine phosphoribosyltransferase (reference gene)         | NM_013556                 | TGACACTGGTAAACAATGCAAACTTTG  | GAGTCCTTTTACCAGCAAGCT         |
